# Supplementary material for: Feasibility and Acceptability of a Rural Palliative Care Intervention for Patients with Heart Failure (RuPAL-HF)
Source: Research Square preprint supplement (doi:10.21203/rs.3.rs-7989609/v1), 2026-01-13
Supplement: Supplementary file 1 [file 8f11701a2f653c5a99e291c2.docx]

Patients and Caregivers

1. First, we would like to hear about your experience being a part of the palliative care intervention.
   1. What was helpful?
   2. What could have been better?
   3. Did you learn new things about your heart or your health in general?
   4. Were there meetings with the Lend a Hand team that were emotionally challenging? How so?
2. Did you meet with any of the palliative care specialists over the computer? If yes, ask:
   1. What was it like to talk to the palliative care specialist over the computer?
   2. Did the computer make it harder to communicate? If so, how?
   3. Did the computer make it easier to communicate in any way? If so, how?
   4. Did the computer make it harder or easier to share your feelings with the palliative care specialist? If so, how? What kind of feelings?
   5. Did you have issues with the technology? Trouble seeing or hearing the doctor? Bandwidth?
   6. What can we do to make it easier for patients like you to use the computer to talk to palliative care teams?
3. Tell us about any conversations you’ve had since the beginning of the intervention about what to expect in the future related to your heart failure.
   1. Who has talked with you about what to expect in the future?
   2. What have you been told about what to expect in the future?
   3. Who started these conversations, you or the clinician?
4. Did you have conversations about what you would want with your health care if you were to get sicker?
   1. What was that conversation like?
   2. Did you complete any documents? (workbook, POLST, advance directive) Why or why not?
   3. If you haven’t had this conversation, would you like to? What would you want this conversation to be like?
5. Is there anything else that you’d like to share with me at this time?
