# Supplementary material for: Feasibility and Acceptability of a Rural Palliative Care Intervention for Patients with Heart Failure (RuPAL-HF)
Source: Research Square preprint supplement (doi:10.21203/rs.3.rs-7989609/v1), 2026-01-13
Supplement: Supplementary file 2 [file c03b698d8681f2af546b2ba0.docx]

Semi-structured interview script for clinicians (primary care, palliative care, Lend a Hand Team, cardiologists)

*Thank you very much for agreeing to participate in this interview. During this conversation, we will:ask you about your perspective on the pilot program.*

*The goal of this discussion is to learn from you so that we can find better ways to support your heart failure patients. We want you to know that there aren’t any right or wrong answers. We will be recording the session but we will not be attaching your comments to your name or identity. Everything shared here will remain confidential.*

- 1. Tell me about your experience with the RuPAL-HF intervention.
     1. What did you like?
     2. How was the intervention helpful?
     3. What didn’t you like?
     4. What was missing?
     5. Where there any patients you recall where the intervention made a difference in their care? Tell me about that.
  2. Now I’d like to hear what you thought about using the “What Matters to Me” Workbook with your patients.
     1. How was that?
     2. What did you like?
     3. What didn’t you like?
  3. Now I’d like to hear your perspective on the collaborative care team?
     1. What was your experience?
     2. What went well?
     3. What could have gone better?

*For the Complex Care Team (RN, SW, health coach):*

- 1. I’d like to hear about your experiences with advance care planning
     1. How did you approach advance care planning in the context of this intervention?
     2. What were the barriers to having these conversations?
     3. Did you use the What Matters to Me Workbook?
        1. Why or why not
        2. What was it like to use the workbook?
        3. What did you like?
        4. What could have been better?
     4. Did you complete any advance care planning documents (advance directives, POLST forms)? Tell me about your experiences
  2. Tell me about any prognostic conversations that you had with your patients. How did they go? What was challenging? What worked well?
  3. Tell me about your experience using the manual
     1. How was it helpful?
     2. What could have been better?

*For everyone*

- 1. Is there anything else that you would like to share with me today?
